# Supplementary material for: A 1,8-naphthalimide based small molecular acceptor for polymer solar cells with high open circuit voltage
Source: Royal Society of Chemistry journal article supplement (doi:10.1039/c5tc01148e), 2015-01-01
Supplement: c5tc01148e1.pdf [file c5tc01148e1.pdf]

## Supporting Information

### 1,8-Naphthalimide based small molecular acceptor for polymer solar cells with high open circuit voltage

Xuejuan Zhang, Jicheng Zhang, Heng Lu, Junyan Wu, Guangwu Li, Cuihong Li,\* Sihui Li, Zhishan Bo\*

*Beijing Key Laboratory of Energy Conversion and Storage Materials, College of Chemistry, Beijing Normal University, Beijing 100875, China*  
*E-mail: zsbo@bnu.edu.cn*

#### 1.1 Measurements and characterization

Unless otherwise noted, all reactions were carried out under a nitrogen atmosphere and monitored by thin layer chromatography (TLC) on silica gel plates.  $^1\text{H}$  and  $^{13}\text{C}$  NMR spectra were recorded on a Bruker AV 400 spectrometer. UV-visible absorption spectra were measured on a PerkinElmer UV-vis spectrometer model Lambda 750. Elemental analyses were carried out on a Flash EA 1112 analyzer. Thermal gravimetric analysis (TGA) and differential scanning calorimetry (DSC) were performed on TA2100 and Perkin-Elmer Diamond differential scanning calorimetry (DSC) instrument, respectively, under an atmosphere of nitrogen at a heating rate of  $10\text{ }^\circ\text{C}/\text{min}$ . Atomic force microscopy (AFM) measurements were carried out under ambient conditions using a Digital Instrument Multimode Nanoscope IIIA using the tapping mode. Transmission electron microscopy (TEM) experiments were performed on H600 TEM Instrument. The thickness of blend films was measured by a Dektak 6 M surface profilometer. XRD experiments were carried out by RAPID IP instrument. The electrochemical behavior of polymers was studied using cyclic voltammetry (CHI 630A Electrochemical Analyzer) with a three-electrode electrochemical cell in a  $0.1\text{ M Bu}_4\text{NPF}_6$   $\text{CH}_3\text{CN}$  solution under an atmosphere of nitrogen with a scanning rate of  $0.1\text{ V/S}$ . A Pt plate working electrode, a Pt wire counter electrode, and an  $\text{Ag}/\text{AgNO}_3$  ( $0.01\text{ M}$  in  $\text{CH}_3\text{CN}$ ) reference electrode were used.

## 1.2 Polymer Solar Cells Fabrication and Characterization

PSCs were fabricated with the device configuration of ITO/PEDOT:PSS (30 nm)/PCDTBT-C12:NI-T-NI/LiF (0.7 nm)/Al (100 nm). The conductivity of ITO is 20  $\Omega$ . PEDOT:PSS (Baytron Al 4083 from H.C. Starck) was filtered with a 0.45  $\mu$ m polyvinylidene difluoride (PVDF) film before use. A PEDOT:PSS thin layer was spin-coated on top of the cleaned ITO substrate at 3000 rpm/s for 60 s and dried subsequently at 130  $^{\circ}$ C for 20 min on a hotplate. The thickness of the PEDOT:PSS layer is about 30 nm. A mixture of PCDTBT-C12 and NI-T-NI in 1,2-dichlorobenzene (DCB) was stirred at 90  $^{\circ}$ C overnight to ensure sufficient dissolution and then the blend solution was spin-coated onto PEDOT:PSS layer to form active layer. Thermal annealing was carried out after the spin-coating process on a hotplate. A top electrode of 0.6 nm LiF and 100 nm of aluminum was thermally evaporated at a pressure of  $10^{-4}$  Pa through a shadow mask. On one substrate five cells with an effective area of 0.04  $\text{cm}^2$  for each were fabricated. Current-voltage (I-V) and external quantum efficiency (EQE) measurements were conducted in air without encapsulation. I-V characteristics were recorded at room temperature using an Agilent B2902A Source Meter under the illumination of an AM1.5G AAA class solar simulator (model XES-301S, SAN-EI) with an intensity of 100  $\text{mW cm}^{-2}$  and the white light intensity was calibrated with a standard single-crystal Si solar cell. To investigate the stability of devices based on PCDTBT-C12:NI-T-NI, devices with a PCDTBT-C12:NI-T-NI weight ratio of 1:4 were fabricated and annealed at 90  $^{\circ}$ C for 3 min. These devices were stored in the glove box without encapsulation and periodically tested for 7 days to investigate the photovoltaic performance.

## 1.3 Field-Effect Devices Fabrication

Hole-only devices with a structure of ITO/PEDOT:PSS (30 nm)/PCDTBT-C12:NI-T-NI/Au (100 nm) and electron-only devices with a configuration of FTO/PCDTBT-C12:NI-T-NI/Al (100 nm) were fabricated. FTO substrates were prepared by etching the commercial FTO substrates with HCl and Zn powders. For hole-only devices, the blend solution of PCDTBT-C12 and NI-T-NI in 1,2-dichlorobenzene (DCB) was spin-

coated onto PEDOT:PSS layer to form active layer like PSC devices, and 100 nm of Au was thermally evaporated at a pressure of  $10^{-4}$  Pa through a shadow mask. For electron-only devices, the blend solution of **PCDTBT-C12** and **NI-T-NI** in 1,2-dichlorobenzene (DCB) were spin-coated on the clean FTO substrates to form active layer. Al electrodes (100 nm) were vacuum deposited on polymer thin films. Dark J-V curves of the hole-only devices and the electron-only devices were measured by the space-charge limited current (SCLC) method.

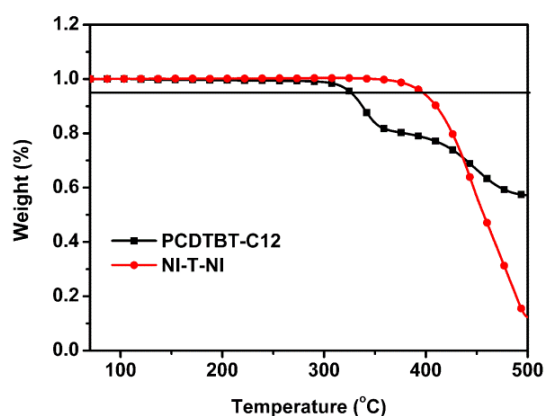

**Figure. S1** TGA curves of **PCDTBT-C12** and **NI-T-NI** under an atmosphere of nitrogen.

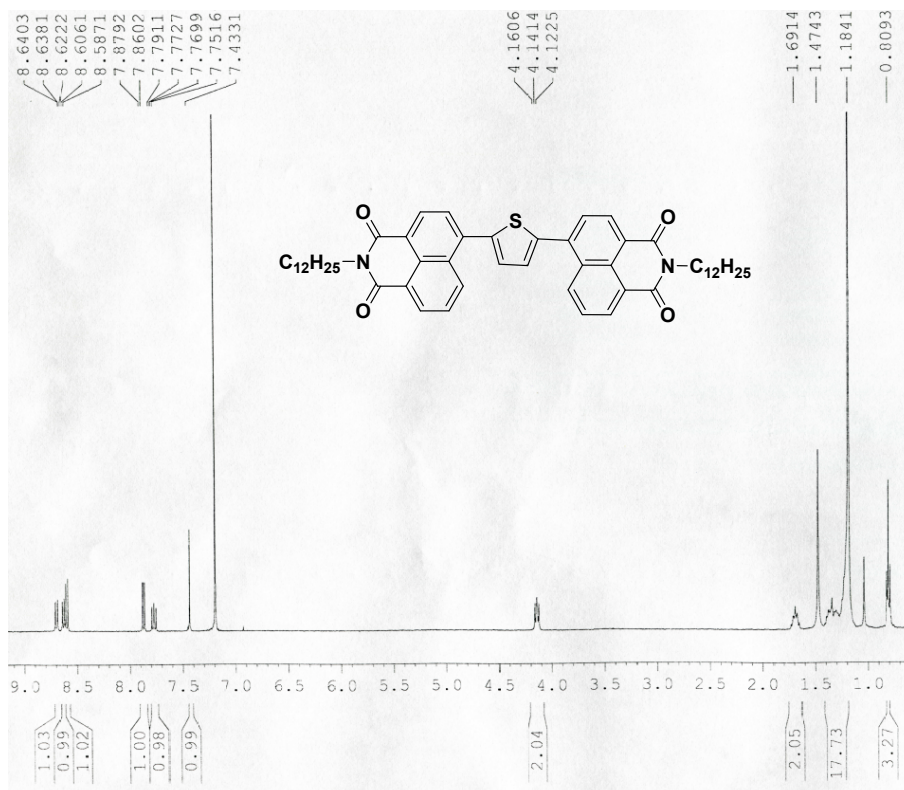

**Figure. S2**  $^1\text{H}$  NMR spectrum of **NI-T-NI** (measured in  $\text{CDCl}_3$ ).

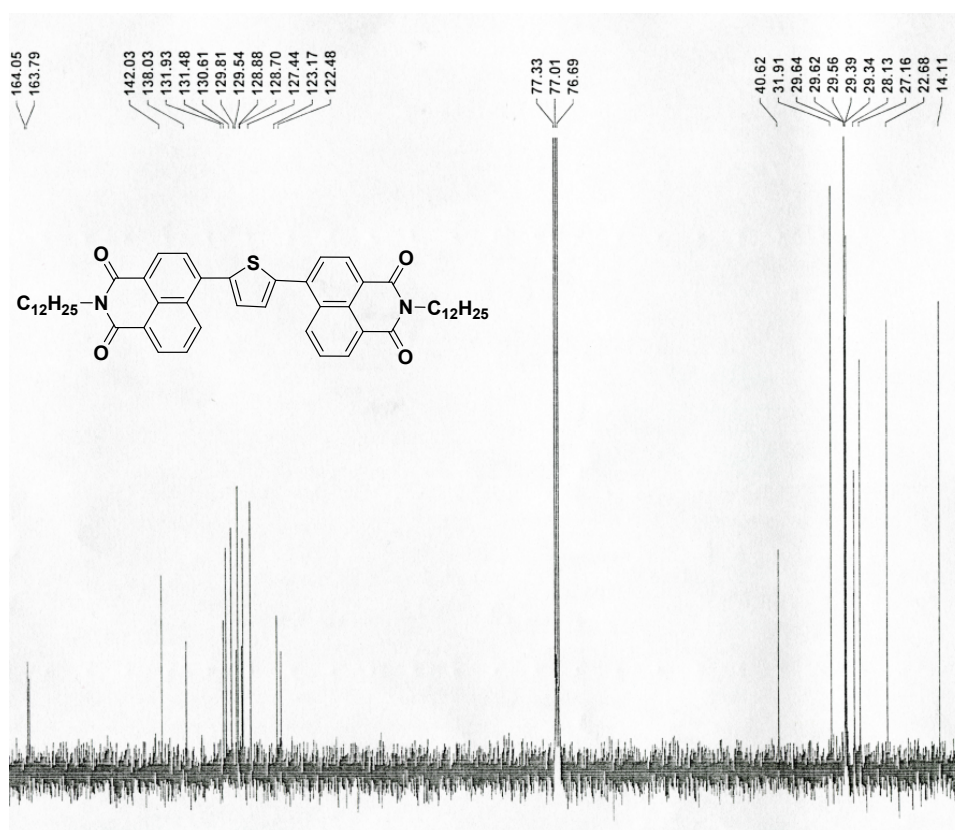

**Figure. S3**  $^{13}\text{C}$  NMR spectrum of **NI-T-NI** (measured in  $\text{CDCl}_3$ ).

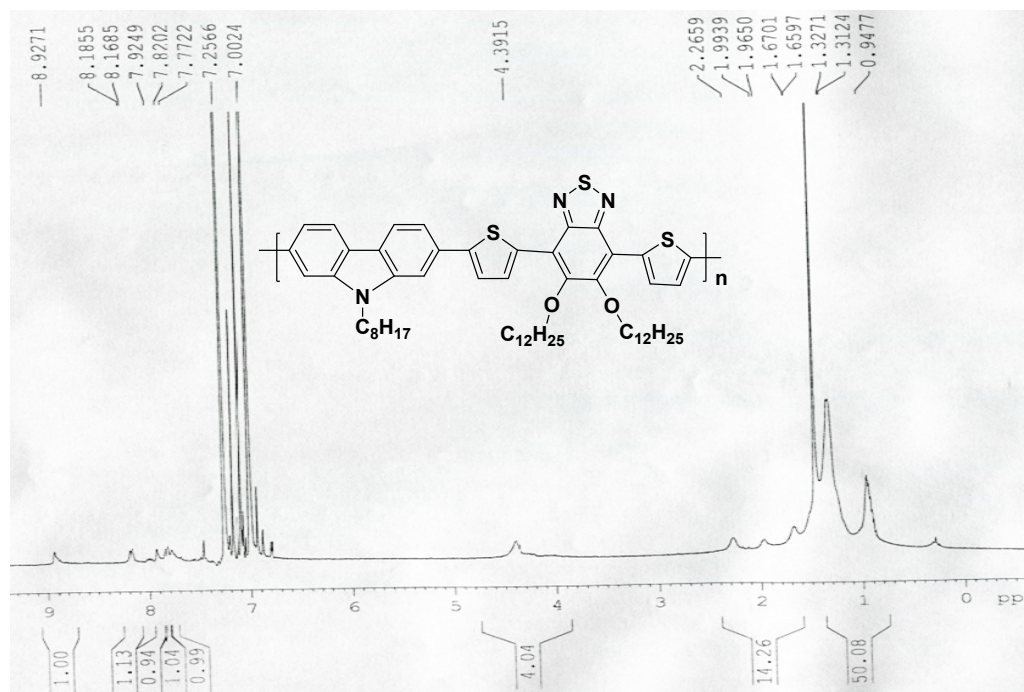

**Figure. S4**  $^1\text{H}$  NMR spectrum of **PCDTBT-C12** (measured in 1,2-dichlorobenzene- $d_4$ ).

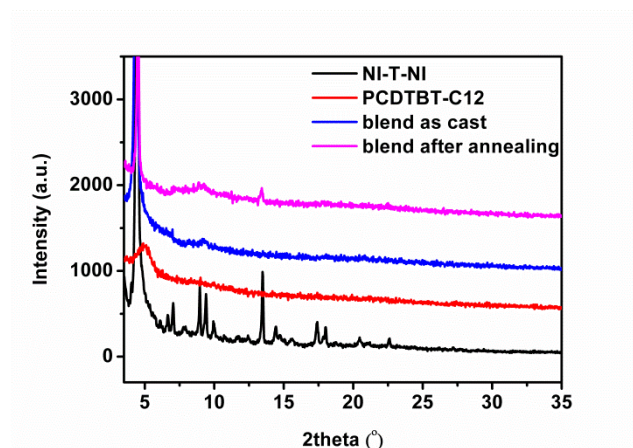

**Figure. S5** XRD images of PCDTBT-C12, NI-T-NI and PCDTBT-C12:NI-T-NI blend films with a weight ratio of 1:4 before and after thermal annealing

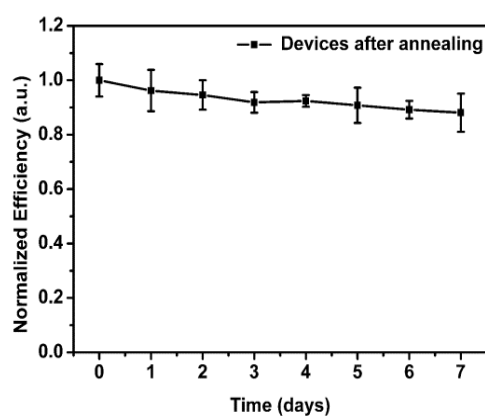

**Figure. S6** Normalized efficiency plotted versus storage time for polymer solar cells based on PCDTBT-C12:NI-T-NI. Measurements were tested on five devices, and the error bars were plus or minus 1 standard deviation from the mean.

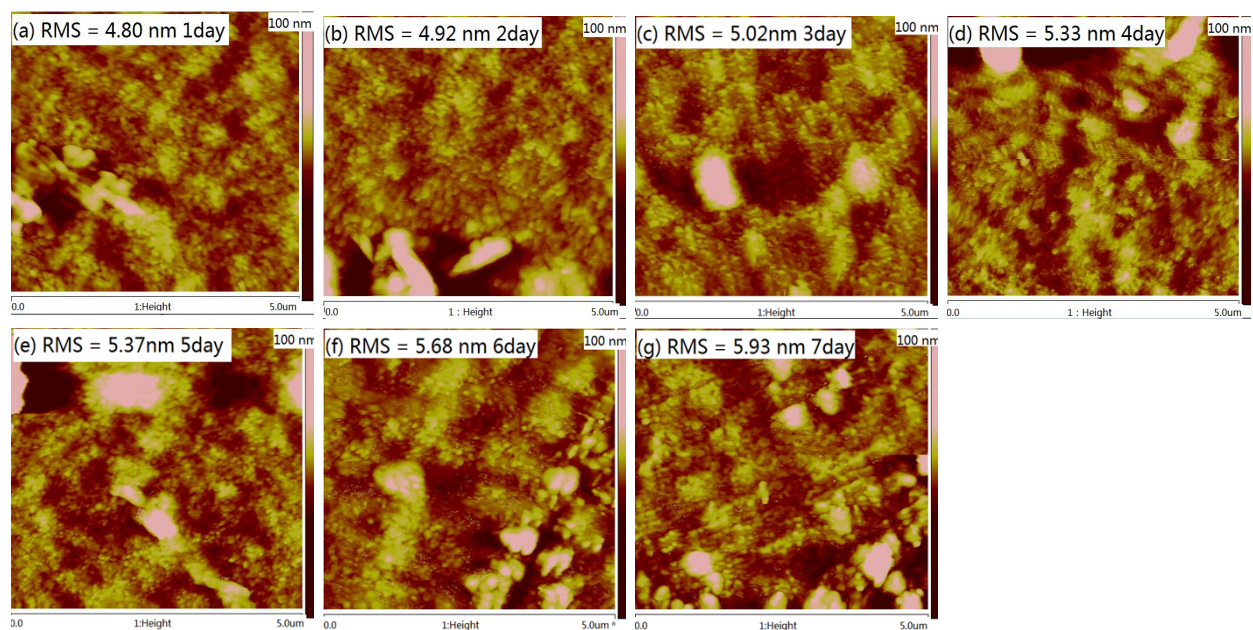

**Figure. S7** AFM height images ( $5\ \mu\text{m} \times 5\ \mu\text{m}$ ) of devices based on PCDTBT-C12:NI-T-NI under different storage time.
